# Supplementary material for: Spectral element modelling of seismic wave propagation in visco-elastoplastic media including excess-pore pressure development
Source: Oxford University Press journal article supplement (doi:10.1093/gji/ggx375), 2017-09-18
Supplement: ggx375_Supp.zip [file ggx375_Supp.zip]

Archive with 1 entries (1 files):
- singlespacing.pdf
